# Supplementary material
Source: PubMed Central journal article supplement (PMC3568610)
Supplement: AEM.02812-12_zam999104094so1.pdf [file AEM.02812-12_zam999104094so1.pdf]

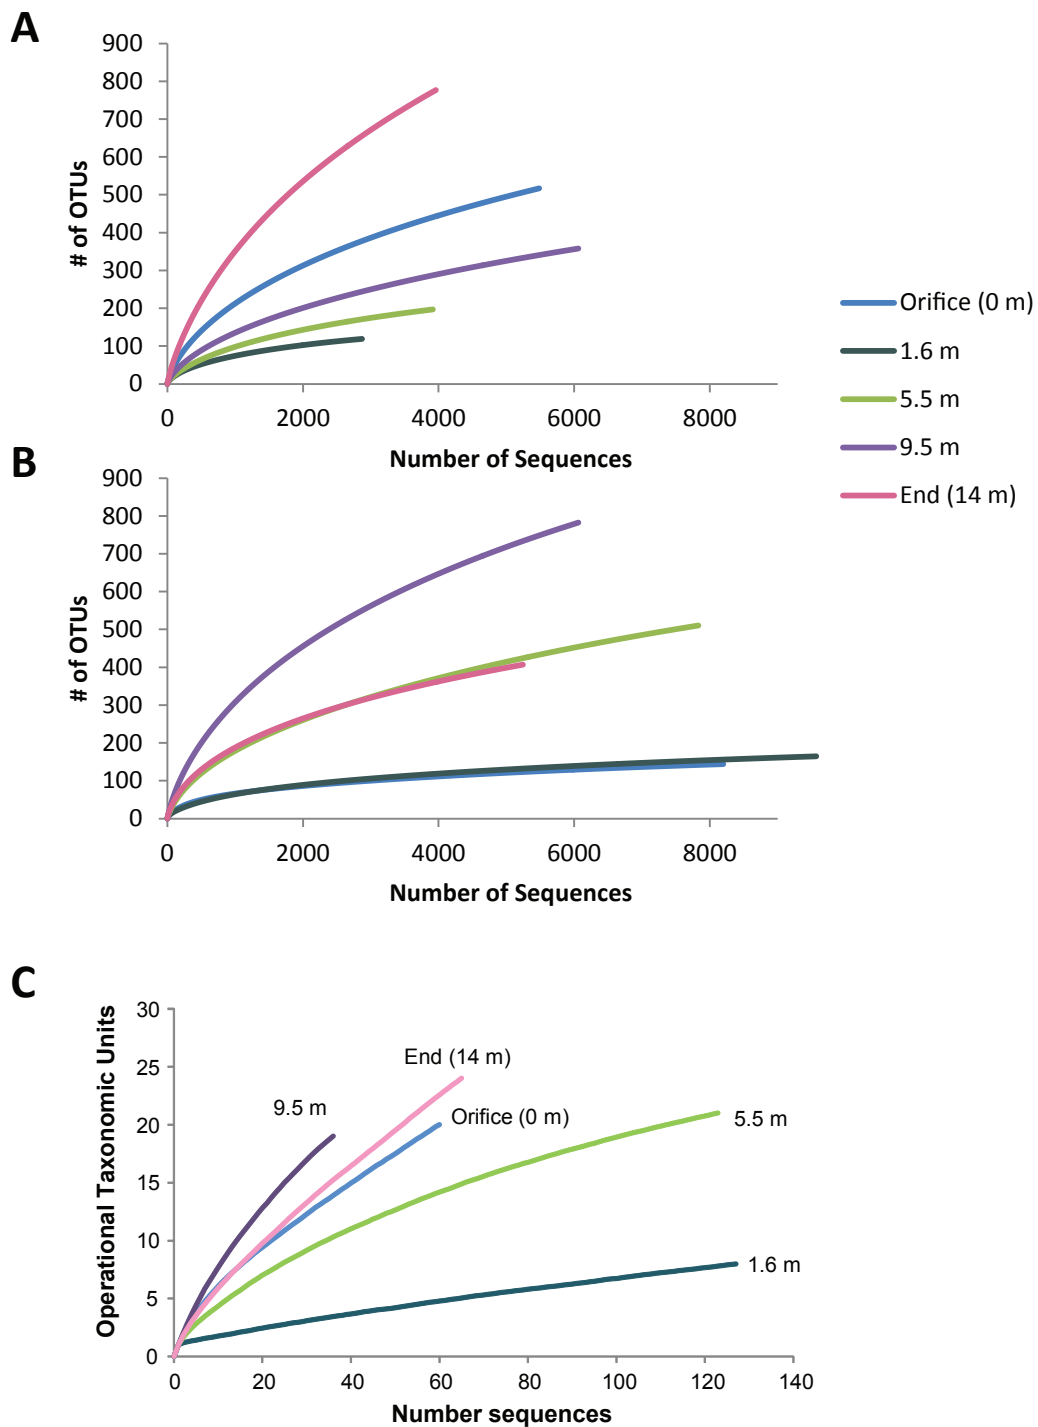

Supplemental Figure S1. Rarefaction curves of (A) 16S rRNA gene pyrosequences for July 2010 microbial mat and sediment samples, and (B) 16S rRNA pyrosequences from October 2010 samples, and (C) *soxB* gene clones from all samples taken from Rattlesnake Spring, Oklahoma.

Headd and Engel “Distribution of sulfur oxidation genes from variable geochemical conditions in a terrestrial sulfidic spring reveals probable differences in metabolic enzyme structure and function” **Applied and Environmental Microbiology**.
