# Supplementary material
Source: PubMed Central journal article supplement (PMC3568610)
Supplement: AEM.02812-12_zam999104094so2.pdf [file AEM.02812-12_zam999104094so2.pdf]

**Headd and Engel**  
**“Geographic distribution of sulfur oxidation genes in a terrestrial sulfidic spring reveals evidence for niche partitioning”**

**Supplemental Table 1.** Number of 16S rRNA pyrosequences (pyrotags) and taxonomic affiliations (class or phylum) along the Rattlesnake Spring flowpath, differentiated by genera, when possible. Operational taxonomic units (OTUs) defined at the 96% sequence identity level.

|                                     | 0 m<br>Orifice | 1.6 m<br>Drop | 5.5 m<br>1st Tran | 9.5 m<br>2nd Tran | 14 m<br>End | Total<br>Pyrotags | OTUs*      |
|-------------------------------------|----------------|---------------|-------------------|-------------------|-------------|-------------------|------------|
| <b><i>Alphaproteobacteria</i></b>   | <b>86</b>      | <b>66</b>     | <b>207</b>        | <b>802</b>        | <b>1401</b> | <b>2562</b>       | <b>460</b> |
| <i>Hyphomonas</i>                   | 1              | 0             | 1                 | 29                | 25          | 56                | 8          |
| <i>Parvularcula</i>                 | 0              | 0             | 2                 | 22                | 92          | 116               | 10         |
| <i>Rhodobacter</i>                  | 7              | 2             | 5                 | 12                | 13          | 39                | 6          |
| <i>Rhodovulum</i>                   | 4              | 0             | 9                 | 1                 | 0           | 14                | 1*         |
| Other                               | 10             | 3             | 7                 | 80                | 90          | 190               | 42         |
| Unidentified                        | 64             | 61            | 183               | 658               | 1181        | 2147              | 393        |
| <b><i>Betaproteobacteria</i></b>    | <b>8</b>       | <b>12</b>     | <b>68</b>         | <b>924</b>        | <b>249</b>  | <b>1261</b>       | <b>126</b> |
| <i>Hydrogenophaga</i>               | 0              | 0             | 5                 | 23                | 23          | 51                | 5          |
| <i>Thiobacillus</i>                 | 0              | 0             | 9                 | 226               | 77          | 312               | 33         |
| <i>Thiomonas</i>                    | 4              | 3             | 7                 | 1                 | 0           | 15                | 2          |
| Other                               | 0              | 0             | 1                 | 7                 | 4           | 12                | 8          |
| Unidentified                        | 4              | 9             | 46                | 667               | 145         | 871               | 78         |
| <b><i>Deltaproteobacteria</i></b>   | <b>487</b>     | <b>24</b>     | <b>122</b>        | <b>66</b>         | <b>9</b>    | <b>708</b>        | <b>97</b>  |
| <i>Desulfocapsa</i>                 | 247            | 10            | 55                | 0                 | 0           | 312               | 14         |
| <i>Desulfuromusa</i>                | 38             | 0             | 14                | 0                 | 0           | 52                | 9          |
| Other                               | 12             | 3             | 2                 | 10                | 0           | 27                | 9          |
| Unidentified                        | 190            | 11            | 51                | 56                | 9           | 317               | 65         |
| <b><i>Epsilonproteobacteria</i></b> | <b>1385</b>    | <b>64</b>     | <b>27</b>         | <b>15</b>         | <b>46</b>   | <b>1537</b>       | <b>51</b>  |
| <i>Arcobacter</i>                   | 0              | 0             | 0                 | 0                 | 43          | 43                | 6          |
| <i>Sulfurimonas</i>                 | 8              | 0             | 0                 | 0                 | 0           | 8                 | *          |
| <i>Sulfurospirillum</i>             | 1              | 2             | 2                 | 0                 | 0           | 5                 | 1          |
| <i>Sulfurovum</i>                   | 25             | 2             | 3                 | 2                 | 0           | 32                | 3          |
| <i>Wolinella</i>                    | 0              | 0             | 1                 | 0                 | 0           | 1                 | 1          |
| Unidentified                        | 1351           | 60            | 21                | 13                | 3           | 1448              | 40         |
| <b><i>Gammaproteobacteria</i></b>   | <b>153</b>     | <b>11148</b>  | <b>9090</b>       | <b>516</b>        | <b>3108</b> | <b>24015</b>      | <b>425</b> |
| <i>Aeromonas</i>                    | 0              | 0             | 0                 | 15                | 2486        | 2501              | 57         |
| <i>Thiofaba</i>                     | 59             | 37            | 268               | 54                | 11          | 429               | 19         |
| <i>Thiothrix</i>                    | 43             | 6745          | 3273              | 143               | 12          | 10216             | 58         |
| <i>Thiovirga</i>                    | 0              | 70            | 0                 | 0                 | 0           | 70                | 2          |
| <i>Vibrio</i>                       | 0              | 0             | 0                 | 0                 | 30          | 30                | 1          |
|                                     | 0 m            | 1.6 m         | 5.5 m             | 9.5 m             | 14 m        | Total             | OTUs       |

|                                           | Orifice     | Drop       | 1st Tran   | 2nd Tran   | End        | Pyrotags     |            |
|-------------------------------------------|-------------|------------|------------|------------|------------|--------------|------------|
| Other                                     | 7           | 0          | 10         | 13         | 113        | 143          | 19         |
| Unidentified                              | 44          | 4296       | 5539       | 291        | 456        | 10626        | 269        |
| <b>Unidentified <i>Proteobacteria</i></b> | <b>302</b>  | <b>643</b> | <b>996</b> | <b>838</b> | <b>216</b> | <b>2995</b>  | <b>**</b>  |
| <b><i>Acidobacteria</i></b>               | <b>0</b>    | <b>0</b>   | <b>1</b>   | <b>9</b>   | <b>9</b>   | <b>19</b>    | <b>5</b>   |
| Group 3                                   | 0           | 0          | 0          | 1          | 0          | 1            | 1          |
| Group 4                                   | 0           | 0          | 0          | 5          | 8          | 13           | 1          |
| Group 9                                   | 0           | 0          | 0          | 0          | 1          | 1            | 1          |
| Group 17                                  | 0           | 0          | 0          | 1          | 0          | 1            | 1          |
| Unidentified                              | 0           | 0          | 1          | 2          | 0          | 3            | 1          |
| <b><i>Actinobacteria</i></b>              | <b>1</b>    | <b>0</b>   | <b>0</b>   | <b>2</b>   | <b>9</b>   | <b>12</b>    | <b>7</b>   |
| <i>Ilumatobacter</i>                      | 0           | 0          | 0          | 1          | 0          | 1            | 1          |
| <i>Microbacterium</i>                     | 0           | 0          | 0          | 0          | 1          | 1            | 1          |
| <i>Propionibacterium</i>                  | 0           | 0          | 0          | 0          | 1          | 1            | 1          |
| Unidentified                              | 1           | 0          | 0          | 1          | 7          | 9            | 4          |
| <b><i>Bacteroidetes</i></b>               | <b>312</b>  | <b>499</b> | <b>305</b> | <b>87</b>  | <b>97</b>  | <b>1300</b>  | <b>179</b> |
| <i>Cloacibacterium</i>                    | 0           | 0          | 0          | 1          | 0          | 1            | 1          |
| <i>Dysgonomonas</i>                       | 0           | 0          | 0          | 0          | 1          | 1            | 1          |
| <i>Flavobacterium</i>                     | 1           | 12         | 4          | 1          | 5          | 23           | 6          |
| Unidentified                              | 311         | 487        | 301        | 85         | 91         | 1275         | 171        |
| <b><i>Chlorobi</i></b>                    | <b>347</b>  | <b>0</b>   | <b>4</b>   | <b>1</b>   | <b>0</b>   | <b>352</b>   | <b>18</b>  |
| <i>Chlorobium</i>                         | 322         | 0          | 4          | 1          | 0          | 327          | 14         |
| Unidentified                              | 25          | 0          | 0          | 0          | 0          | 25           | 4          |
| <b><i>Chloroflexi</i></b>                 | <b>541</b>  | <b>24</b>  | <b>9</b>   | <b>1</b>   | <b>1</b>   | <b>576</b>   | <b>39</b>  |
| <i>Chloroflexus</i>                       | 126         | 0          | 0          | 0          | 0          | 126          | 12         |
| Unidentified                              | 415         | 24         | 9          | 1          | 1          | 450          | 27         |
| <b><i>Cyanobacteria</i></b>               | <b>9236</b> | <b>47</b>  | <b>302</b> | <b>314</b> | <b>782</b> | <b>10681</b> | <b>261</b> |
| <i>Gpl</i>                                | 686         | 3          | 15         | 135        | 63         | 902          | 30         |
| Other                                     | 99          | 0          | 0          | 0          | 11         | 110          | 5          |
| Unidentified                              | 8451        | 44         | 287        | 179        | 708        | 9669         | 226        |
| <b><i>Firmicutes</i></b>                  | <b>0</b>    | <b>3</b>   | <b>7</b>   | <b>8</b>   | <b>15</b>  | <b>33</b>    | <b>21</b>  |
| <i>Clostridium</i>                        | 0           | 0          | 0          | 0          | 2          | 2            | 1          |
| <i>Faecalibacterium</i>                   | 0           | 1          | 0          | 0          | 1          | 2            | 1          |
| <i>Gemella</i>                            | 0           | 0          | 2          | 0          | 0          | 2            | 1          |
| <i>Halobacillus</i>                       | 0           | 0          | 0          | 0          | 1          | 1            | 1          |
| <i>Lactococcus</i>                        | 0           | 0          | 2          | 0          | 1          | 3            | 1          |
| <i>Oscillibacter</i>                      | 0           | 0          | 0          | 1          | 0          | 1            | 2          |
| Unidentified                              | 0           | 2          | 3          | 7          | 10         | 22           | 14         |
| <b><i>Fusobacteria</i></b>                | <b>0</b>    | <b>0</b>   | <b>3</b>   | <b>15</b>  | <b>12</b>  | <b>30</b>    | <b>13</b>  |
| Unidentified                              | 0           | 0          | 3          | 15         | 12         | 30           | 13         |

|                                | 0 m<br>Orifice | 1.6 m<br>Drop | 5.5 m<br>1st Tran | 9.5 m<br>2nd Tran | 14 m<br>End | Total<br>Pyrotags | OTUs       |
|--------------------------------|----------------|---------------|-------------------|-------------------|-------------|-------------------|------------|
| <b><i>Gemmatimonadetes</i></b> | <b>1</b>       | <b>0</b>      | <b>0</b>          | <b>0</b>          | <b>1</b>    | <b>2</b>          | <b>2</b>   |
| <i>Gemmatimonas</i>            | 1              | 0             | 0                 | 0                 | 0           | 1                 | 1          |
| Unidentified                   | 0              | 0             | 0                 | 0                 | 1           | 1                 | 1          |
| <b><i>Nitrospira</i></b>       | <b>0</b>       | <b>0</b>      | <b>0</b>          | <b>66</b>         | <b>8</b>    | <b>74</b>         | <b>8</b>   |
| <i>Nitrospira</i>              | 0              | 0             | 0                 | 59                | 6           | 65                | 6          |
| Unidentified                   | 0              | 0             | 0                 | 7                 | 2           | 9                 | 2          |
| <b><i>Planctomycetes</i></b>   | <b>1</b>       | <b>0</b>      | <b>1</b>          | <b>21</b>         | <b>30</b>   | <b>53</b>         | <b>28</b>  |
| Gemmata                        | 0              | 0             | 0                 | 1                 | 0           | 1                 | *          |
| Planctomyces                   | 0              | 0             | 0                 | 1                 | 7           | 8                 | 2          |
| Rhodopirellula                 | 0              | 0             | 0                 | 0                 | 2           | 2                 | *          |
| Unidentified                   | 1              | 0             | 1                 | 19                | 21          | 42                | 26         |
| <b><i>Spirochaetes</i></b>     | <b>104</b>     | <b>27</b>     | <b>37</b>         | <b>3</b>          | <b>3</b>    | <b>174</b>        | <b>21</b>  |
| <i>Leptonema</i>               | 0              | 0             | 30                | 1                 | 0           | 31                | 3          |
| <i>Spirochaeta</i>             | 16             | 1             | 0                 | 0                 | 0           | 17                | 3          |
| <i>Treponema</i>               | 0              | 1             | 0                 | 0                 | 0           | 1                 | *          |
| <i>Turneriella</i>             | 65             | 19            | 2                 | 0                 | 0           | 86                | 4          |
| Unidentified                   | 23             | 6             | 5                 | 2                 | 3           | 39                | 11         |
| <b><i>Verrucomicrobia</i></b>  | <b>10</b>      | <b>4</b>      | <b>1</b>          | <b>15</b>         | <b>66</b>   | <b>96</b>         | <b>36</b>  |
| <i>Cerasicoccus</i>            | 0              | 0             | 0                 | 0                 | 2           | 2                 | 2          |
| <i>Haloferula</i>              | 0              | 0             | 0                 | 4                 | 0           | 4                 | 4          |
| <i>Luteolibacter</i>           | 0              | 0             | 0                 | 5                 | 0           | 5                 | 6          |
| Opitutus                       | 0              | 0             | 0                 | 0                 | 1           | 1                 | *          |
| Subdivision3 genera            | 1              | 0             | 0                 | 0                 | 0           | 1                 | 1          |
| Unidentified                   | 9              | 4             | 1                 | 6                 | 63          | 83                | 23         |
| <b>Candidate Division OP10</b> | <b>5</b>       | <b>0</b>      | <b>2</b>          | <b>0</b>          | <b>1</b>    | <b>8</b>          | <b>3</b>   |
| OP10 genera                    | 5              | 0             | 1                 | 0                 | 0           | 6                 | 1          |
| Unidentified                   | 0              | 0             | 1                 | 0                 | 1           | 2                 | 2          |
| <b>Candidate Division SR1</b>  | <b>14</b>      | <b>57</b>     | <b>2</b>          | <b>0</b>          | <b>0</b>    | <b>73</b>         | <b>14</b>  |
| SR1 genera                     | 14             | 36            | 2                 | 0                 | 0           | 52                | 9          |
| Unidentified                   | 0              | 21            | 0                 | 0                 | 0           | 21                | 5          |
| <b>Candidate Division TM7</b>  | <b>1</b>       | <b>0</b>      | <b>0</b>          | <b>0</b>          | <b>0</b>    | <b>1</b>          | <b>1</b>   |
| Unidentified                   | 1              | 0             | 0                 | 0                 | 0           | 1                 | 1          |
| <b>Candidate Division WS3</b>  | <b>1</b>       | <b>0</b>      | <b>0</b>          | <b>0</b>          | <b>0</b>    | <b>1</b>          | <b>1</b>   |
| Unidentified                   | 1              | 0             | 0                 | 0                 | 0           | 1                 | 1          |
| <b><i>Eukaryota</i></b>        | <b>1</b>       | <b>5</b>      | <b>68</b>         | <b>7916</b>       | <b>2324</b> | <b>10314</b>      | <b>239</b> |
| <i>Bacillariophyta</i>         | 1              | 4             | 64                | 3338              | 633         | 4040              | 199        |
| <i>Streptophyta</i>            | 0              | 1             | 1                 | 3860              | 1234        | 5096              | 38         |
| <i>Chlorophyta</i>             | 0              | 0             | 0                 | 0                 | 3           | 3                 | 2          |
| Unidentified                   | 0              | 0             | 3                 | 718               | 454         | 1175              | **         |

| <b>Unidentified Bacteria</b> | <b>694</b> | <b>247</b> | <b>554</b> | <b>1086</b> | <b>821</b> | <b>3402</b> | <b>1037</b> |
|------------------------------|------------|------------|------------|-------------|------------|-------------|-------------|
| Total                        |            |            |            |             |            | 60279       | 3092        |

\*Group affiliation with OTUs is based on the most abundant pyrosequences in the OTUs. Many OTUs at the genus level contain 16S rRNA sequences with identified genera and unidentified 16S rRNA sequences. As a result some lesser abundant genera reside in OTUs predominated by unidentified sequences and are accounted for in the unidentified bacteria OTUs.

\*\*Unidentified *Proteobacteria* and *Eukaryota* OTUs are accounted for in unidentified bacteria.

Other refers to those genera within a major group in which only a few 16S rRNA sequences were found in the entire spring.

Unidentified refers to those sequences that were less than 80% similar to a major group or less than 94% similar to a genus.
